# Supplementary material for: Modulation of the Liver Protein Carbonylome by the Combined Effect of Marine Omega-3 PUFAs and Grape Polyphenols Supplementation in Rats Fed an Obesogenic High Fat and High Sucrose Diet
Source: PubMed Central journal article supplement (PMC7024381; doi:10.3390/md18010034), 2019-12-30
Supplement: marinedrugs-18-00034-s001.pdf [file marinedrugs-18-00034-s001.pdf]

## Supplementary

### Modulation of the Liver Protein Carbonylome by the Combined Effect of Marine Omega-3 PUFAs and Grape Polyphenols Supplementation in Rats Fed an Obesogenic High Fat and High Sucrose Diet

Lucía Méndez <sup>1,\*</sup>, Silvia Muñoz <sup>1</sup>, Bernat Miralles-Pérez <sup>2</sup>, M. Rosa Nogués <sup>2</sup>, Sara Ramos-Romero <sup>3,4</sup>, Josep L. Torres <sup>3</sup> and Isabel Medina <sup>1</sup>

**Figure S1.** Determination of the linear range for the quantification of albumin in rat plasma base on Coomassie intensity. Bands were analyzed by using LabImage 1D (Kapelan Bio-Imaging Solutions, Halle, Germany).

| Rat plasma (µg) | Coomassie intensity for Albumin |
|-----------------|---------------------------------|
| 2               | 18230                           |
| 5               | 40903                           |
| 7               | 91847                           |
| 10              | 138208                          |
| 15              | 213675                          |
| 20              | 257536                          |
| 25              | 321583                          |
| 30              | 265843                          |

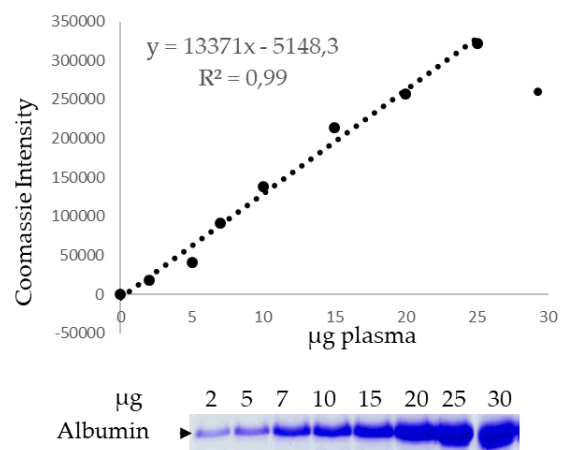

**Supplementary Table S1.** Pathways and processes enriched by FOM, GSE and FOM&GSE in rats fed either HFHS or STD diet. "Count" is the number of genes with membership in the given ontology term. "%" is the percentage of all of the user-provided genes that are found in the given ontology term (only input genes with at least one ontology term annotation are included in the calculation). "Log10(P)" is the p-value in log base 10. "Log10(q)" is the multi-test adjusted p-value in log base 10.<sup>1</sup>. HFHS: high-fat and high-sucrose diet; STD: standard diet; GSE: grape seed polyphenols extract; FOM: fish oil mixture.

| Background diet   | Supplement | GO         | Category                   | Description                           | Count | %     | Log10(P) | Log10(q) | Gene Symbols                                       | Other significant members in the cluster (in order of significance)                                                                                                                                                                                                                                                                    |
|-------------------|------------|------------|----------------------------|---------------------------------------|-------|-------|----------|----------|----------------------------------------------------|----------------------------------------------------------------------------------------------------------------------------------------------------------------------------------------------------------------------------------------------------------------------------------------------------------------------------------------|
| <b>HFHS DIETS</b> |            |            |                            |                                       |       |       |          |          |                                                    |                                                                                                                                                                                                                                                                                                                                        |
| HFHS              | FOM        | GO:0044282 | GO<br>Biological Processes | small molecule catabolic process      | 5     | 50.00 | -6.32    | -2.06    | Acadl,<br>Otc, Hpd,<br>Aldh2,<br>Upb1,<br>Cat, Pgd | protein homooligomerization;<br>organic acid catabolic process;<br>carboxylic acid catabolic process;<br>protein complex oligomerization;<br>liver development; hepaticobiliary system development; small molecule biosynthetic process;<br>carboxylic acid biosynthetic process; organic acid biosynthetic process; gland development |
| HFHS              | FOM        | GO:0006520 | GO<br>Biological Processes | cellular amino acid metabolic process | 4     | 40.00 | -4.97    | -1.01    | Otc, Hpd,<br>Upb1,<br>Nit2                         | alpha-amino acid metabolic process                                                                                                                                                                                                                                                                                                     |
| HFHS              | FOM        | GO:0042737 | GO<br>Biological Processes | drug catabolic process                | 3     | 30.00 | -4.18    | -0.52    | Cat, Hpd,<br>Aldh2,<br>Acadl,<br>Otc, Actb         | alcohol metabolic process, organic hydroxy compound metabolic process, response to acid chemical, response to toxic substance, drug metabolic process                                                                                                                                                                                  |
| HFHS              | FOM        | GO:0007584 | GO<br>Biological Processes | response to nutrient                  | 3     | 30.00 | -3.05    | 0.00     | Alb, Cat,<br>Otc                                   | response to metal ion, response to nutrient levels, response to extracellular stimulus, response to inorganic substance                                                                                                                                                                                                                |

<sup>1</sup>Gene names in green colour represent proteins that decreased their carbonylation level by the supplement and gene names in red colour represent proteins that increased their carbonylation level by the supplement

|      |     |                  |                               |                                          |   |       |       |       |                                                |                                                                                                                                                                                                                                                                                                                                                                                                                                                                  |
|------|-----|------------------|-------------------------------|------------------------------------------|---|-------|-------|-------|------------------------------------------------|------------------------------------------------------------------------------------------------------------------------------------------------------------------------------------------------------------------------------------------------------------------------------------------------------------------------------------------------------------------------------------------------------------------------------------------------------------------|
| HFHS | FOM | GO:0032787       | GO<br>Biological<br>Processes | monocarboxylic acid<br>metabolic process | 3 | 30.00 | -2.52 | 0.00  | Acadl,<br>Nit2, Pgd                            |                                                                                                                                                                                                                                                                                                                                                                                                                                                                  |
| HFHS | FOM | R-RNO-<br>168249 | Reactome<br>Gene Sets         | Innate Immune<br>System                  | 3 | 30.00 | -2.21 | 0.00  | Cat, Actb,<br>Nit2                             |                                                                                                                                                                                                                                                                                                                                                                                                                                                                  |
| HFHS | GSE | GO:0044282       | GO<br>Biological<br>Processes | small molecule<br>catabolic process      | 6 | 75.00 | -9.00 | -4.75 | Acadl,<br>Otc, Got2,<br>Hpd,<br>Aldh2,<br>Upb1 | organic acid catabolic process,<br>carboxylic acid catabolic process,<br>cellular amino acid biosynthetic<br>process, cellular amino acid<br>metabolic process, alpha-amino<br>acid catabolic process, cellular<br>amino acid catabolic process,<br>carboxylic acid biosynthetic<br>process<br>organic acid biosynthetic process,<br>Metabolism of amino acids and<br>derivatives, alpha-amino acid<br>metabolic process, small molecule<br>biosynthetic process |
| HFHS | GSE | GO:0006066       | GO<br>Biological<br>Processes | alcohol metabolic<br>process             | 4 | 50.00 | -5.21 | -1.80 | Cat,<br>Acadl,<br>Aldh2,<br>Akr1c9,<br>Hpd     | drug catabolic process, antibiotic<br>metabolic process, organic hydroxy<br>compound metabolic process,<br>steroid metabolic process, drug<br>metabolic process                                                                                                                                                                                                                                                                                                  |
| HFHS | GSE | GO:0051260       | GO<br>Biological<br>Processes | protein<br>homooligomerization           | 4 | 50.00 | -4.86 | -1.65 | Cat,<br>Acadl,<br>Otc, Upb1                    | protein complex oligomerization                                                                                                                                                                                                                                                                                                                                                                                                                                  |
| HFHS | GSE | GO:0042180       | GO<br>Biological<br>Processes | cellular ketone<br>metabolic process     | 3 | 37.50 | -4.17 | -1.12 | Cat, Got2,<br>Akr1c9                           | cofactor metabolic process                                                                                                                                                                                                                                                                                                                                                                                                                                       |
| HFHS | GSE | GO:0048732       | GO<br>Biological<br>Processes | gland development                        | 4 | 50.00 | -4.01 | -1.03 | Otc, Got2,<br>Aldh2,<br>Upb1                   | liver development, hepaticobiliary<br>system development                                                                                                                                                                                                                                                                                                                                                                                                         |

|                       |         |                                          |                               |                                          |   |       |       |       |                                          |                                                                                                                                                                                                                                                                    |
|-----------------------|---------|------------------------------------------|-------------------------------|------------------------------------------|---|-------|-------|-------|------------------------------------------|--------------------------------------------------------------------------------------------------------------------------------------------------------------------------------------------------------------------------------------------------------------------|
| HFHS                  | GSE     | GO:0032868                               | GO<br>Biological<br>Processes | response to insulin                      | 3 | 37.50 | -3.53 | -0.67 | Cat, Otc,<br>Got2,<br>Aldh2              | response to acid chemical; response<br>to peptide hormone; response to<br>peptide; response to toxic<br>substance                                                                                                                                                  |
| HFHS                  | FOM&GSE | GO:0006520                               | GO<br>Biological<br>Processes | cellular amino acid<br>metabolic process | 4 | 36.36 | -4.78 | -0.65 | Otc, Hpd,<br>Upb1,<br>Nit2               | alpha-amino acid metabolic<br>process                                                                                                                                                                                                                              |
| HFHS                  | FOM&GSE | GO:0044282                               | GO<br>Biological<br>Processes | small molecule<br>catabolic process      | 4 | 36.36 | -4.48 | -0.65 | Acadl,<br>Otc, Hpd,<br>Upb1,<br>Cat, Pgd | protein homooligomerization,<br>organic acid catabolic process,<br>carboxylic acid catabolic process,<br>protein complex oligomerization,<br>small molecule biosynthetic<br>process, carboxylic acid<br>biosynthetic process, organic acid<br>biosynthetic process |
| HFHS                  | FOM&GSE | GO:0007584                               | GO<br>Biological<br>Processes | response to nutrient                     | 4 | 36.36 | -4.31 | -0.65 | Alb, Cat,<br>Otc,<br>Hspd1,<br>Tf, Actb  | response to inorganic substance,<br>response to metal ion, response to<br>nutrient levels, response to<br>extracellular stimulus, response to<br>hypoxia, response to decreased<br>oxygen levels, response to oxygen<br>levels, response to toxic substance        |
| HFHS                  | FOM&GSE | R-RNO-<br>5653656                        | Reactome<br>Gene Sets         | Vesicle-mediated<br>transport            | 3 | 27.27 | -2.55 | 0.00  | Alb, Tf,<br>Actb                         |                                                                                                                                                                                                                                                                    |
| HFHS                  | FOM&GSE | GO:0032787                               | GO<br>Biological<br>Processes | monocarboxylic acid<br>metabolic process | 3 | 27.27 | -2.39 | 0.00  | Acadl,<br>Nit2, Pgd                      |                                                                                                                                                                                                                                                                    |
| HFHS                  | FOM&GSE | R-RNO-<br>168249                         | Reactome<br>Gene Sets         | Innate Immune<br>System                  | 3 | 27.27 | -2.08 | 0.00  | Cat, Actb,<br>Nit2                       |                                                                                                                                                                                                                                                                    |
| <b>STANDARD DIETS</b> |         |                                          |                               |                                          |   |       |       |       |                                          |                                                                                                                                                                                                                                                                    |
| STD                   | FOM     | No significant pathways/process enriched |                               |                                          |   |       |       |       |                                          |                                                                                                                                                                                                                                                                    |

|     |         |              |                         |                                               |   |       |       |       |                                       |                                                                                                                                                                                                                              |
|-----|---------|--------------|-------------------------|-----------------------------------------------|---|-------|-------|-------|---------------------------------------|------------------------------------------------------------------------------------------------------------------------------------------------------------------------------------------------------------------------------|
| STD | GSE     | rno01200     | KEGG Pathway            | Carbon metabolism                             | 4 | 40.00 | -6.38 | -2.12 | Cat, Got2, Tkt, Pgd, Akr1c9           | cofactor metabolic process                                                                                                                                                                                                   |
| STD | GSE     | GO:0006081   | GO Biological Processes | cellular aldehyde metabolic process           | 3 | 30.00 | -5.18 | -1.45 | Adh1, Tkt, Pgd, Akr1c9, Nit2          | monocarboxylic acid metabolic process                                                                                                                                                                                        |
| STD | GSE     | GO:0009064   | GO Biological Processes | glutamine family amino acid metabolic process | 3 | 30.00 | -5.11 | -1.45 | Otc, Got2, Nit2, Tkt, Adh1, Pgd       | glutamine family amino acid metabolic process; biosynthesis of amino acids, alpha-amino acid metabolic process, cellular amino acid metabolic process, small molecule catabolic process, small molecule biosynthetic process |
| STD | GSE     | GO:0009636   | GO Biological Processes | response to toxic substance                   | 5 | 50.00 | -4.66 | -1.17 | Adh1, Cat, Got2, Hspd1, Actb, Akr1c14 | response to activity, antibiotic metabolic process, response to antibiotic, response to ethanol, alcohol metabolic process, response to alcohol, organic hydroxy compound metabolic process, drug metabolic process          |
| STD | GSE     | GO:0032868   | GO Biological Processes | response to insulin                           | 3 | 30.00 | -3.21 | -0.13 | Cat, Otc, Got2, Hspd1, Adh1           | response to insulin, response to nutrient, response to acid chemical, response to peptide hormone, response to peptide, response to nutrient levels, response to extracellular stimulus, response to inorganic substance     |
| STD | GSE     | R-RNO-168249 | Reactome Gene Sets      | Innate Immune System                          | 3 | 30.00 | -2.21 | 0.00  | Cat, Actb, Nit2                       |                                                                                                                                                                                                                              |
| STD | FOM&GSE | GO:1901605   | GO Biological Processes | alpha-amino acid metabolic process            | 5 | 62.50 | -7.98 | -3.79 | P4hb, Otc, Ass1, Got2,                | glutamine family amino acid metabolic process; cellular amino acid metabolic process; arginine metabolic process; alpha-amino                                                                                                |

|     |         |            |                         |                             |   |       |       |       |                                       |                                                                                                                                                                                                                                                                                                                                                                                                                                                                                                                                                                                                |
|-----|---------|------------|-------------------------|-----------------------------|---|-------|-------|-------|---------------------------------------|------------------------------------------------------------------------------------------------------------------------------------------------------------------------------------------------------------------------------------------------------------------------------------------------------------------------------------------------------------------------------------------------------------------------------------------------------------------------------------------------------------------------------------------------------------------------------------------------|
|     |         |            |                         |                             |   |       |       |       | Fah,<br>Aldh2                         | acid catabolic process; small molecule catabolic process; cellular amino acid catabolic process; organic acid catabolic process; carboxylic acid catabolic process                                                                                                                                                                                                                                                                                                                                                                                                                             |
| STD | FOM&GSE | mo00220    | KEGG Pathway            | Arginine biosynthesis       | 3 | 37.50 | -7.19 | -3.63 | Otc, Ass1,<br>Got2, Cat,<br>Aldh2     | alpha-amino acid biosynthetic process; cellular amino acid biosynthetic process; Biosynthesis of amino acids; Metabolism of amino acids and derivatives; response to acid chemical; response to peptide hormone; gland development; response to peptide; liver development; hepatobiliary system development; response to insulin; carboxylic acid biosynthetic process; organic acid biosynthetic process; response to nutrient; response to metal ion; small molecule biosynthetic process; response to nutrient levels; response to extracellular stimulus; response to inorganic substance |
| STD | FOM&GSE | GO:0009636 | GO Biological Processes | response to toxic substance | 5 | 62.50 | -5.28 | -1.97 | Cat, Ass1,<br>Got2,<br>Aldh2,<br>Actb |                                                                                                                                                                                                                                                                                                                                                                                                                                                                                                                                                                                                |
| STD | FOM&GSE | GO:0070542 | GO Biological Processes | response to fatty acid      | 3 | 37.50 | -4.72 | -1.58 | Cat, Ass1,<br>Aldh2,<br>Fah, P4hb     | drug catabolic process; response to estradiol; drug metabolic process; organic hydroxy compound metabolic process; response to oxygen levels                                                                                                                                                                                                                                                                                                                                                                                                                                                   |
